# Supplementary material for: FTIR-Assisted Electroreduction of CO2 and H2O to CO and H2 by Electrochemically Deposited Copper on Oxidized Graphite Felt
Source: PubMed Central journal article supplement — ACS Omega. 2022 Dec 1;7(49):45067–76. doi: 10.1021/acsomega.2c05486 (PMC9753529; doi:10.1021/acsomega.2c05486), 2022-12-01
Supplement: ao2c05486_si_001.pdf [file ao2c05486_si_001.pdf]

# FTIR-assisted electroreduction of CO<sub>2</sub> and H<sub>2</sub>O to CO and H<sub>2</sub> by electrochemically deposited copper on oxidized graphite felt

**Manuel E. G. Winkler<sup>1,\*</sup>, Ricardo Henrique Gonçalves<sup>1</sup>, Adley Forti Rubira<sup>1,\*</sup>**

<sup>1</sup>Department of Chemistry, State University of Maringá, Av. Colombo 5790, CEP 87020-900, Maringá, PR, Brazil

\*Corresponding authors: manuelgw@gmail.com, afrubira@gmail.com

## 1. LIST OF FIGURES

|                                                                                                                                                                                    |   |
|------------------------------------------------------------------------------------------------------------------------------------------------------------------------------------|---|
| Figure S1. H-type electrochemical cell used in the experiments. ....                                                                                                               | 5 |
| Figure S2. Short-path gas cell used for FTIR measurements. A) Side and B) front-view. ....                                                                                         | 5 |
| Figure S3. A) FTIR spectra of different volumes of CO <sub>2</sub> . B) CO <sub>2</sub> analytical curve. C) FTIR spectra of different volumes of CO. D) CO analytical curve. .... | 6 |
| Figure S4. Counter electrode compartment in the electrochemical cell developed for FTIR analysis of the generated gaseous products. ....                                           | 7 |
| Figure S5. A) Graphite Felt/Water contact angle and B) wettability of graphite felt and Oxidized-graphite felt (OGF). ....                                                         | 8 |
| Figure S6. Low magnification images of the surface of A) Graphite felt, B) Cu-OGF pH 4, C) Cu-OGF pH 6, D), Cu-OGF pH 8, and E) Cu-OGF pH 10. ....                                 | 8 |
| Figure S7. High magnification SEM images of the surface of A) Cu-OGF pH 4, B) Cu-OGF pH 6, C) Cu-OGF pH 8, and D) Cu-OGF pH 10. ....                                               | 9 |

|                                                                                                                                                                                                                                                                               |    |
|-------------------------------------------------------------------------------------------------------------------------------------------------------------------------------------------------------------------------------------------------------------------------------|----|
| Figure S8. Cross-section SEM images of A) Graphite felt, B-E) Cu-OGF electrodes prepared in pH 4.0, 6.0, 8.0, and 10, respectively. ....                                                                                                                                      | 10 |
| Figure S9. Size distribution of copper particles on the surface of A) Cu-OGF pH 4, B) Cu-OGF pH 6, C) Cu-OGF pH 8, and D) Cu-OGF pH 10. ....                                                                                                                                  | 11 |
| Figure S10. First five cycles of Cu-OGF pH 2 electrode voltammetry in 0.1 M NaHCO <sub>3</sub> and 0.1 M KCl N <sub>2</sub> -saturated. Scan rate 20 mV.s <sup>-1</sup> . ....                                                                                                | 12 |
| Figure S11. Cyclic voltammograms of the A) Cu-OGF pH 4, B) Cu-OGF pH 6, C) Cu-OGF pH 8, D) Cu-OGF pH 10 E) OGF and Cu-foam electrodes in 0.1 NaHCO <sub>3</sub> and 0.1 M KCl N <sub>2</sub> -saturated and CO <sub>2</sub> -saturated. Scan rate 1 mV.s <sup>-1</sup> . .... | 13 |
| Figure S12. Nyquist diagrams and equivalent circuit simulation data of the electrodes A) Cu-OGF pH 4, B) Cu-OGF pH 6, C) Cu-OGF pH 8, and D) Cu-OGF pH 10 in 0.1 M NaHCO <sub>3</sub> and 0.1 M KCl CO <sub>2</sub> -saturated at -0.68 V vs RHE. ....                        | 14 |
| Figure S13. Chronoamperometry curves of Cu-OGF pH 2 electrode at different applied voltages in CO <sub>2</sub> -saturated NaHCO <sub>3</sub> -saturated electrolyte. ....                                                                                                     | 16 |
| Figure S14. A) FTIR spectra of the produced gases at different currents at 4000-500 cm <sup>-1</sup> (inset: 2226-2020 cm <sup>-1</sup> ), B) and C) absorption regions of carbon monoxide and carbon dioxide, respectively. D) Chronopotentiometric curves. ....             | 18 |
| Figure S15. A) FTIR spectra of the produced gases at -1.15 V vs RHE at 4000-500 cm <sup>-1</sup> (inset: 2226-2020 cm <sup>-1</sup> ), B) and C) absorption regions of carbon monoxide and carbon dioxide, respectively. D) Chronoamperometric curve. ....                    | 20 |
| Figure S16. A) FTIR spectra of the produced gases at -2.5 mA at 4000-500 cm <sup>-1</sup> (inset: 2226-2020 cm <sup>-1</sup> ), B) and C) absorption regions of carbon monoxide and carbon dioxide, respectively. D) Chronopotentiometric curve. ....                         | 22 |
| Figure S17. A) Chronopotentiometric curves of Cu foam electrode at -5.0 mA and -10 mA in a two-electrode configuration cell; B-C) Full-range and expanded                                                                                                                     |    |

FTIR spectra of the produced gas at -10 mA, respectively; and D) absorption region of carbon monoxide and E) carbon dioxide. .... 25

Figure S18. A-B) Low and C-D) high-magnification SEM images of post-electrolysis Cu-OGF pH 2 electrode. .... 27

Figure S19. EDX spectra of A) pre and B) post-electrolysis Cu-OGF pH 2 electrode.. 28

## 2. LIST OF TABLES

|                                                                                                                                            |    |
|--------------------------------------------------------------------------------------------------------------------------------------------|----|
| Table S1. Copper shell thickness of Cu-OGF electrodes measured by the cross-section SEM images. ....                                       | 10 |
| Table S2. XRD assignment of as-prepared Cu-OGF pH 2. ....                                                                                  | 11 |
| Table S3. XRD assignment of reduced Cu-OGF pH 2. ....                                                                                      | 12 |
| Table S4. Equivalent circuit simulation data of Cu-OGF pH 2, Cu-OGF pH 4, Cu-OGF pH 6, Cu-OGF pH 8, and Cu-OGF pH 10 electrodes. ....      | 15 |
| Table S5. Chronoamperometry results at different applied voltages and faradaic efficiency towards CO, H <sub>2</sub> and total.....        | 17 |
| Table S6. Chronopotentiometry results at different currents and faradaic efficiency towards CO, H <sub>2</sub> and total.....              | 19 |
| Table S7. Chronoamperometric results at -1.15 V vs RHE and faradaic efficiency towards CO, H <sub>2</sub> and total.....                   | 21 |
| Table S8. Chronopotentiometric results at -2.5 mA and faradaic efficiency towards CO, H <sub>2</sub> and total.....                        | 23 |
| Table S9. Chronopotentiometric results at -10.0 mA and faradaic efficiency towards CO, H <sub>2</sub> and total for Cu-foam electrode..... | 26 |

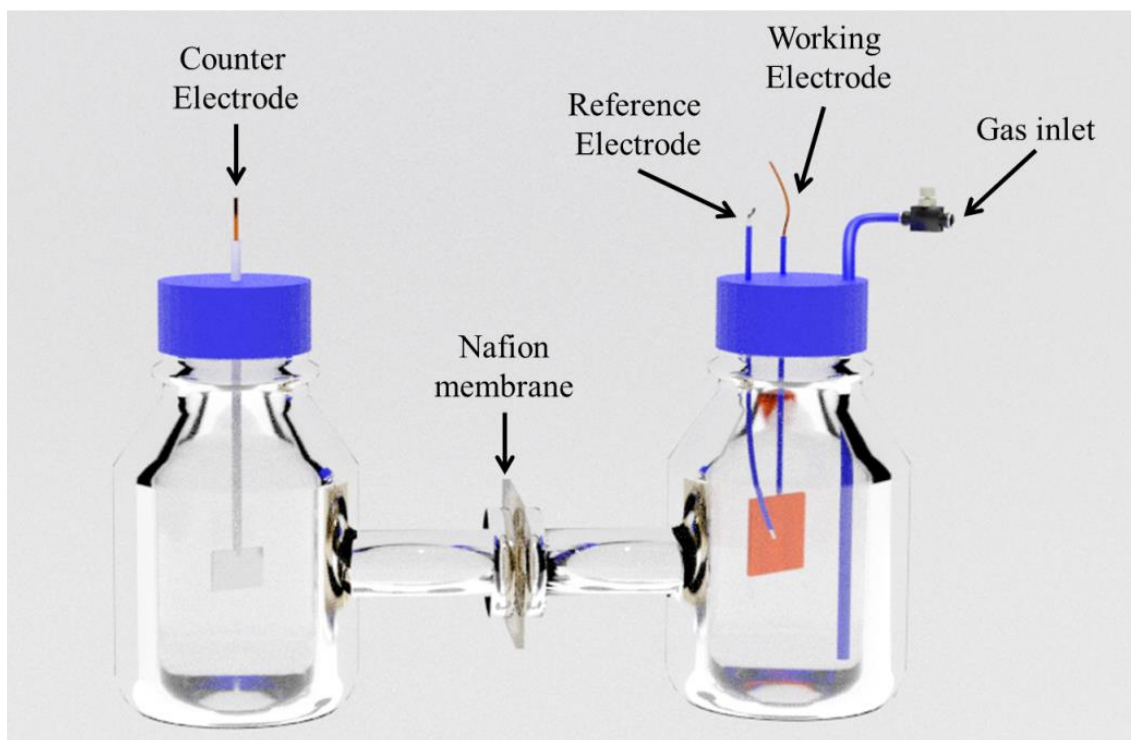

**Figure S1.** H-type electrochemical cell used in the experiments.

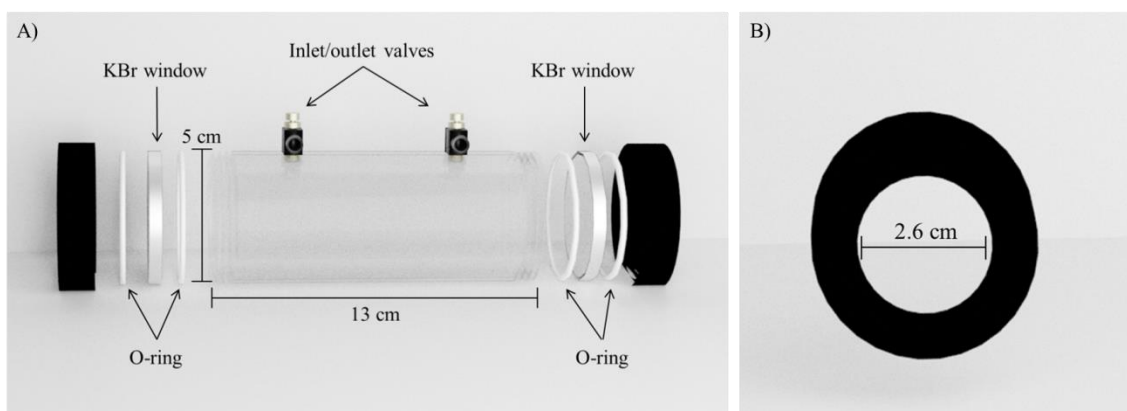

**Figure S2.** Short-path gas cell used for FTIR measurements. A) Side and B) front-view.

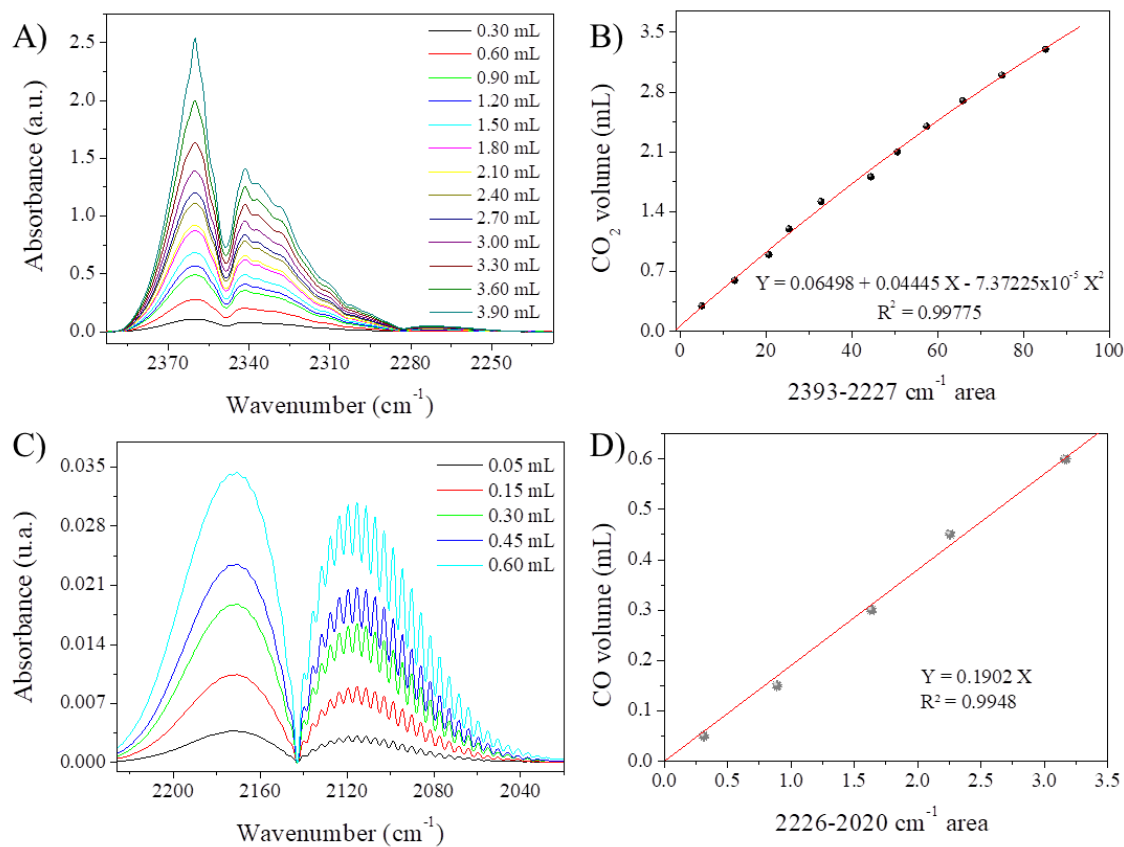

**Figure S3.** A) FTIR spectra of different volumes of CO<sub>2</sub>. B) CO<sub>2</sub> analytical curve. C) FTIR spectra of different volumes of CO. D) CO analytical curve.

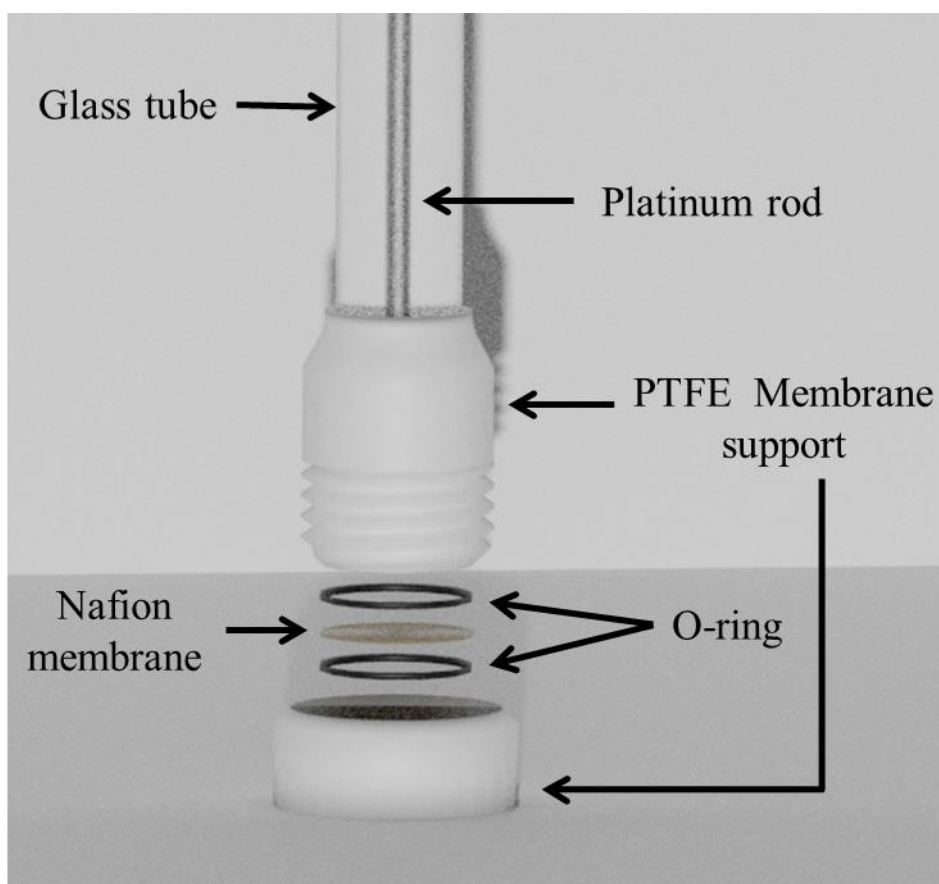

**Figure S4.** Counter electrode compartment in the electrochemical cell developed for FTIR analysis of the generated gaseous products.

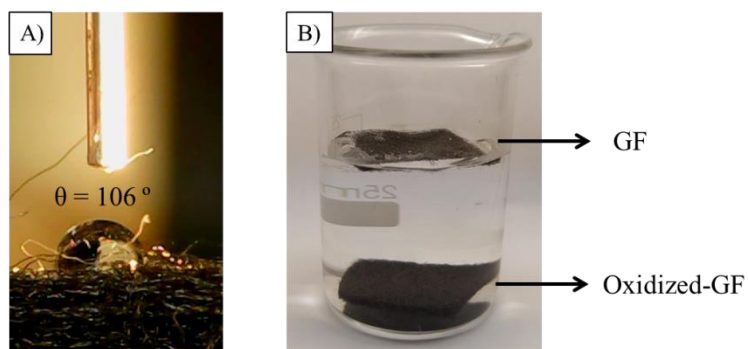

**Figure S5.** A) Graphite Felt/Water contact angle and B) wettability of graphite felt and Oxidized-graphite felt (OGF).

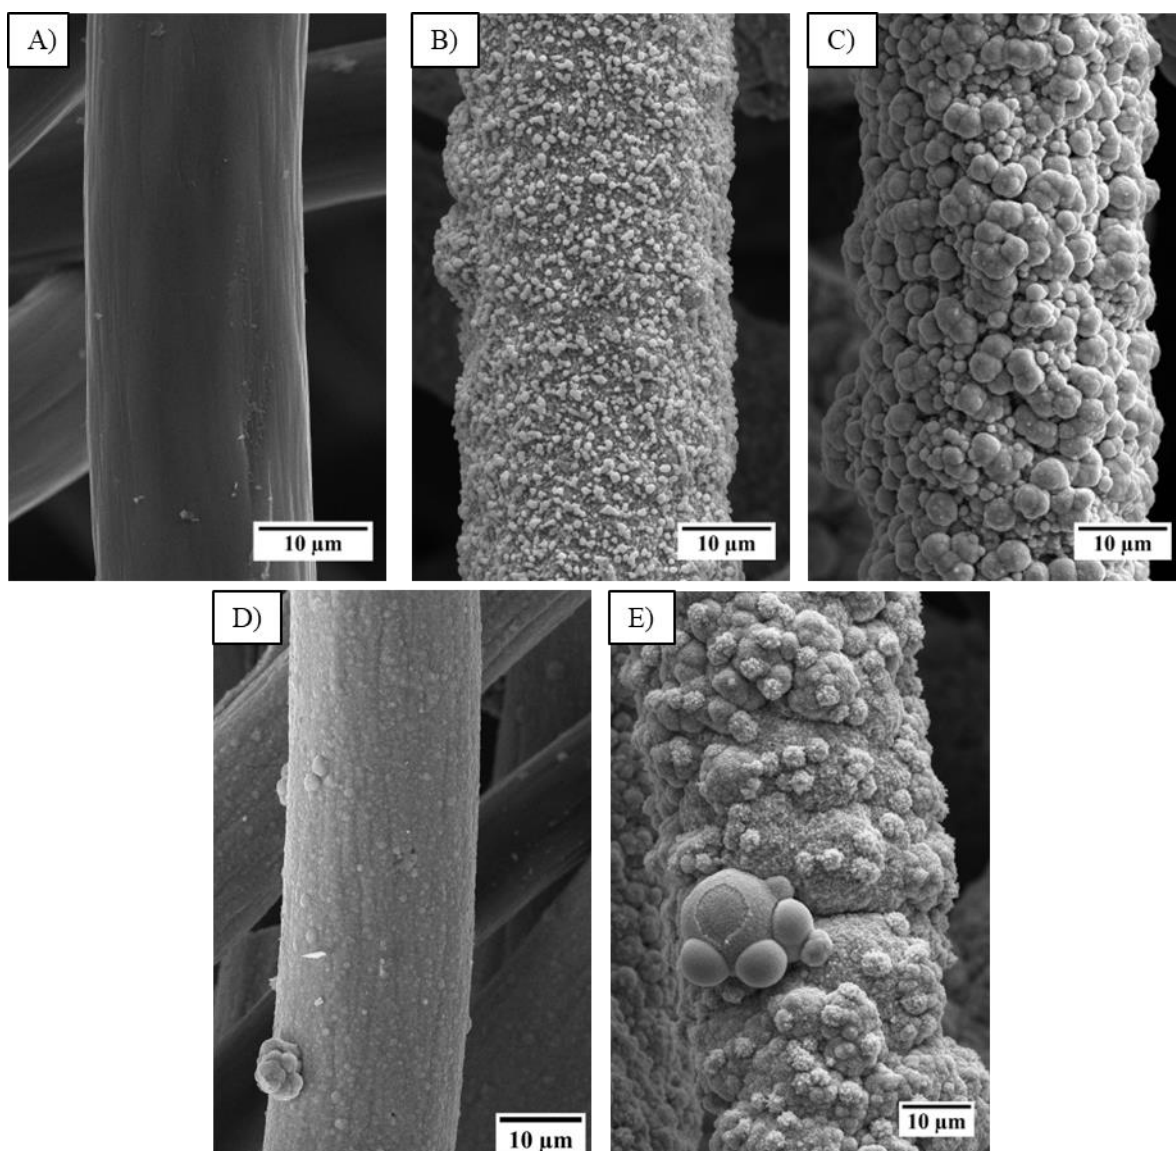

**Figure S6.** Low magnification images of the surface of A) Graphite felt, B) Cu-OGF pH 4, C) Cu-OGF pH 6, D), Cu-OGF pH 8, and E) Cu-OGF pH 10.



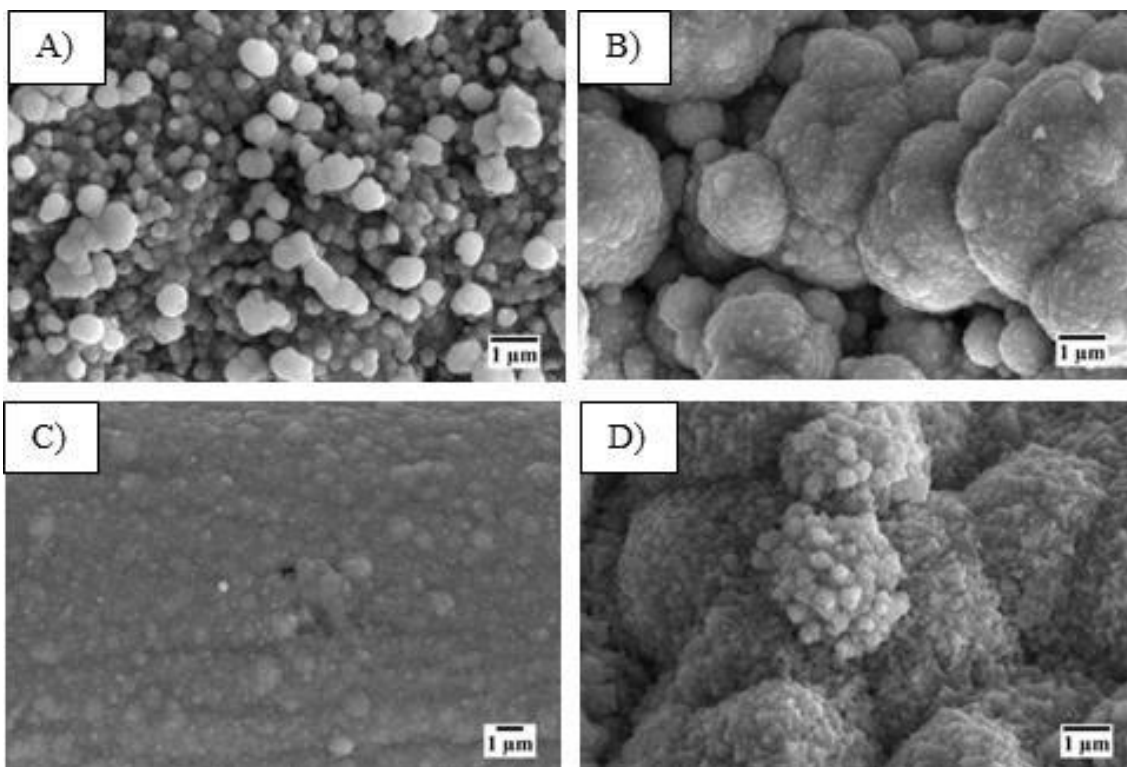

**Figure S7.** High magnification SEM images of the surface of A) Cu-OGF pH 4, B) Cu-OGF pH 6, C) Cu-OGF pH 8, and D) Cu-OGF pH 10.

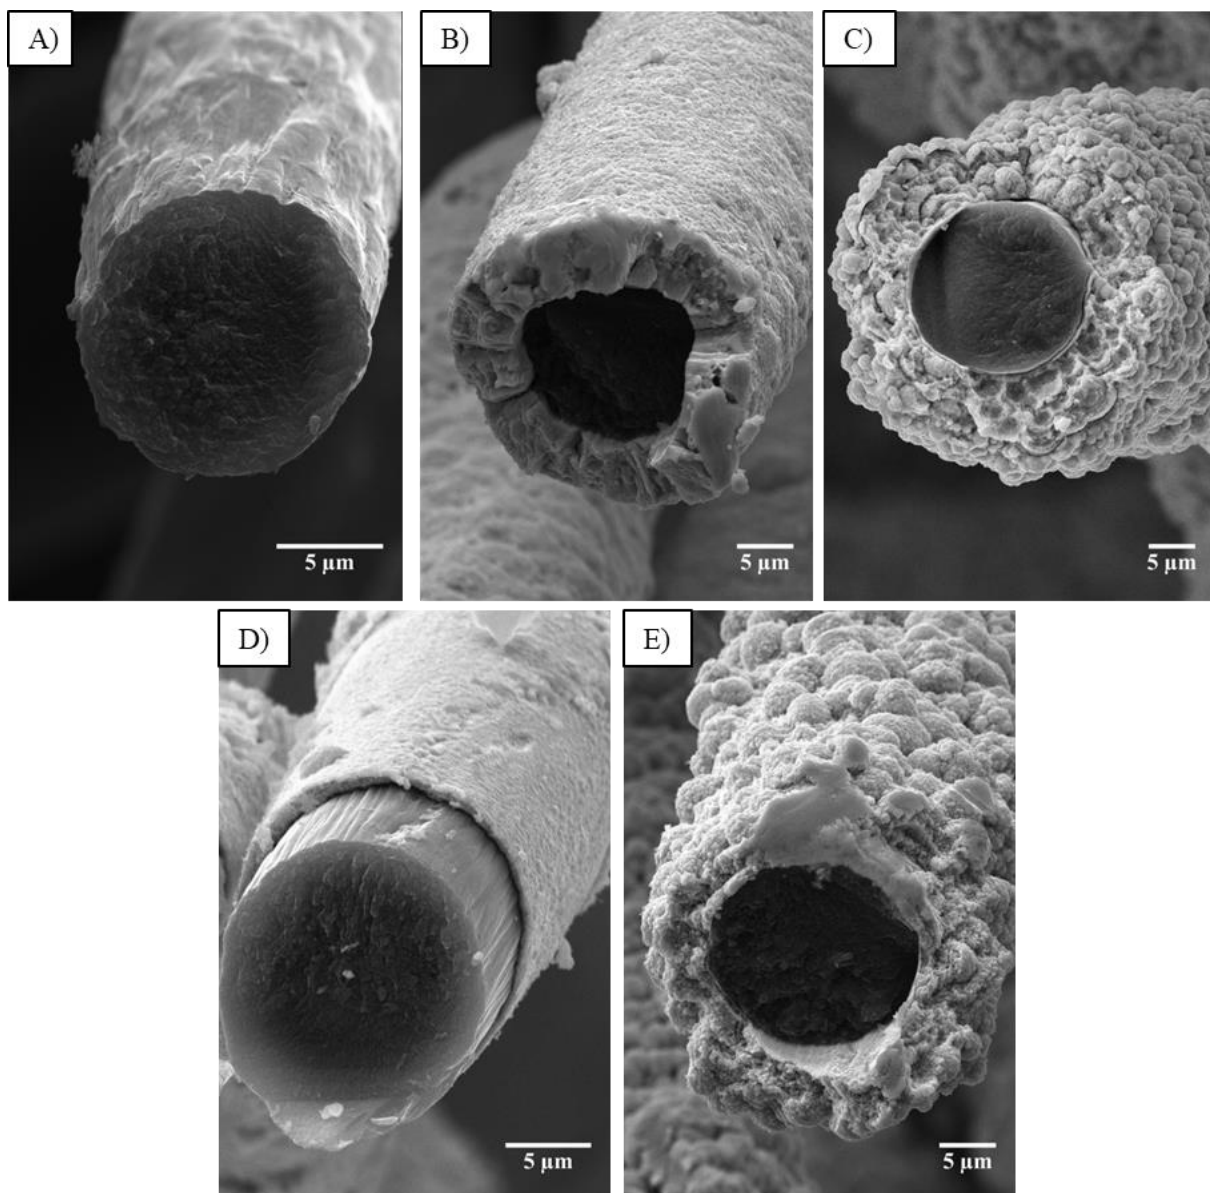

**Figure S8.** Cross-section SEM images of A) Graphite felt, B-E) Cu-OGF electrodes prepared in pH 4.0, 6.0, 8.0, and 10, respectively.

**Table S1.** Copper shell thickness of Cu-OGF electrodes measured by the cross-section SEM images.

| Electrodepositionp H | Copper shell thickness (μm) |
|----------------------|-----------------------------|
| 2.0                  | 2.2                         |
| 4.0                  | 5.9                         |
| 6.0                  | 9.2                         |
| 8.0                  | 1.1                         |
| 10.0                 | 6.1                         |

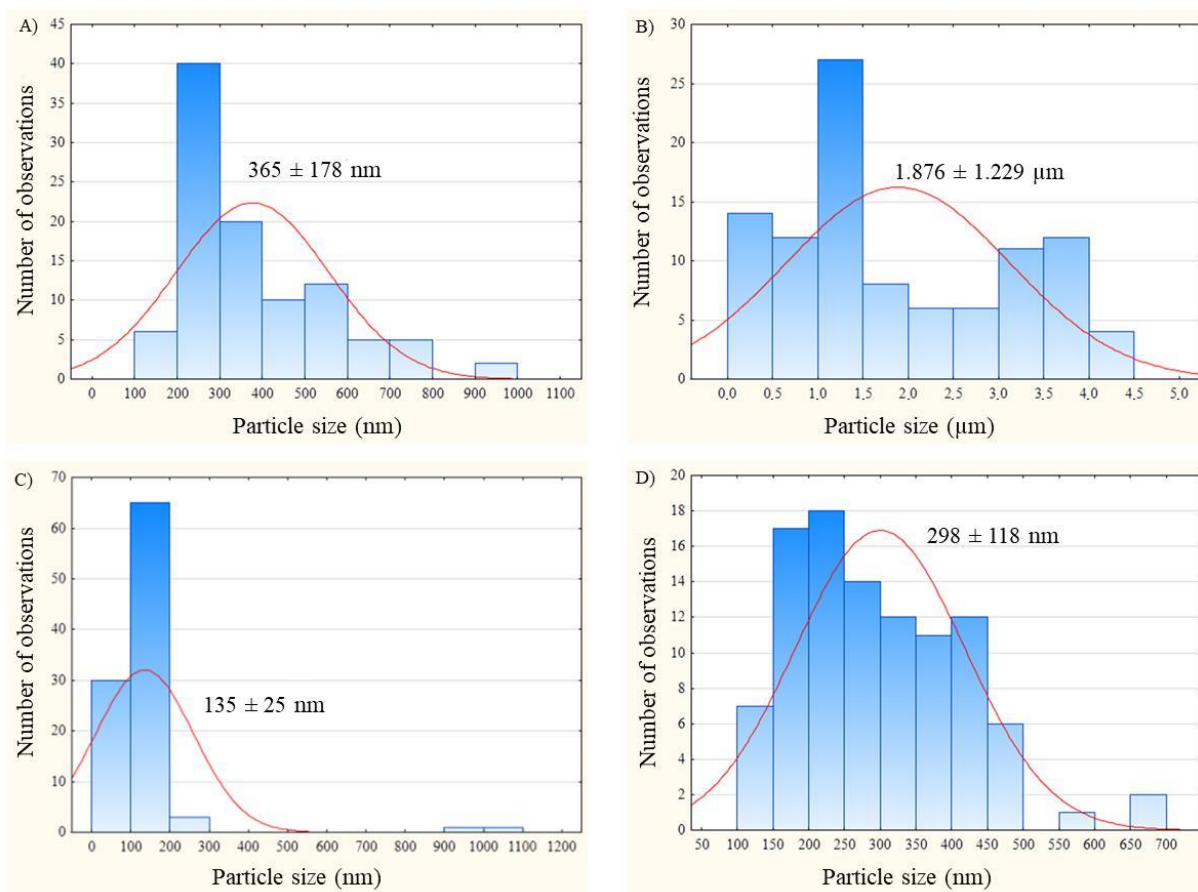

**Figure S9.** Size distribution of copper particles on the surface of A) Cu-OGF pH 4, B) Cu-OGF pH 6, C) Cu-OGF pH 8, and D) Cu-OGF pH 10.

**Table S2.** XRD assignment of as-prepared Cu-OGF pH 2.

| 2θ (°) | Assignment         | Plane | Relative Intensity (%) |
|--------|--------------------|-------|------------------------|
| 26.3   | Graphite           | (002) | 21.17                  |
| 36.7   | Cu <sub>2</sub> O* | (111) | 14.57                  |
| 42.5   | Cu <sub>2</sub> O* | (200) | 4.73                   |
| 43.6   | Cu*                | (111) | 100                    |
| 50.7   | Cu*                | (200) | 45.26                  |
| 61.5   | Cu <sub>2</sub> O* | (220) | 3.35                   |
| 73.7   | Cu <sub>2</sub> O* | (311) | 4.23                   |
| 74.3   | Cu*                | (220) | 22.78                  |

\*JCPDS 03-065-3288;

\*JCPDS 00-004-0836.

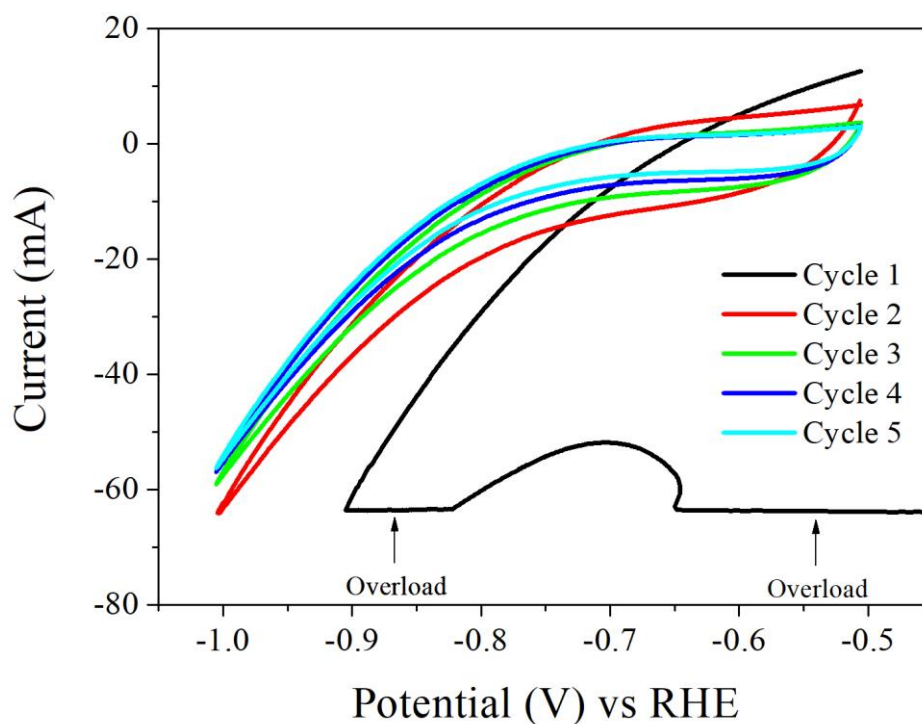

**Figure S10.** First five cycles of Cu-OGF pH 2 electrode voltammetry in 0.1 M NaHCO<sub>3</sub> and 0.1 M KCl N<sub>2</sub>-saturated. Scan rate 20 mV.s<sup>-1</sup>.

**Table S3.** XRD assignment of reduced Cu-OGF pH 2.

| 2θ (°) | Assignment         | Plane | Relative Intensity (%) |
|--------|--------------------|-------|------------------------|
| 26.3   | Graphite           | (002) | 6.28                   |
| 36.7   | Cu <sub>2</sub> O* | (111) | 2.30                   |
| 43.6   | Cu*                | (111) | 100                    |
| 50.7   | Cu*                | (200) | 28.16                  |
| 74.3   | Cu*                | (220) | 14.82                  |

\*JCPDS 03-065-3288;

\*JCPDS 00-004-0836.

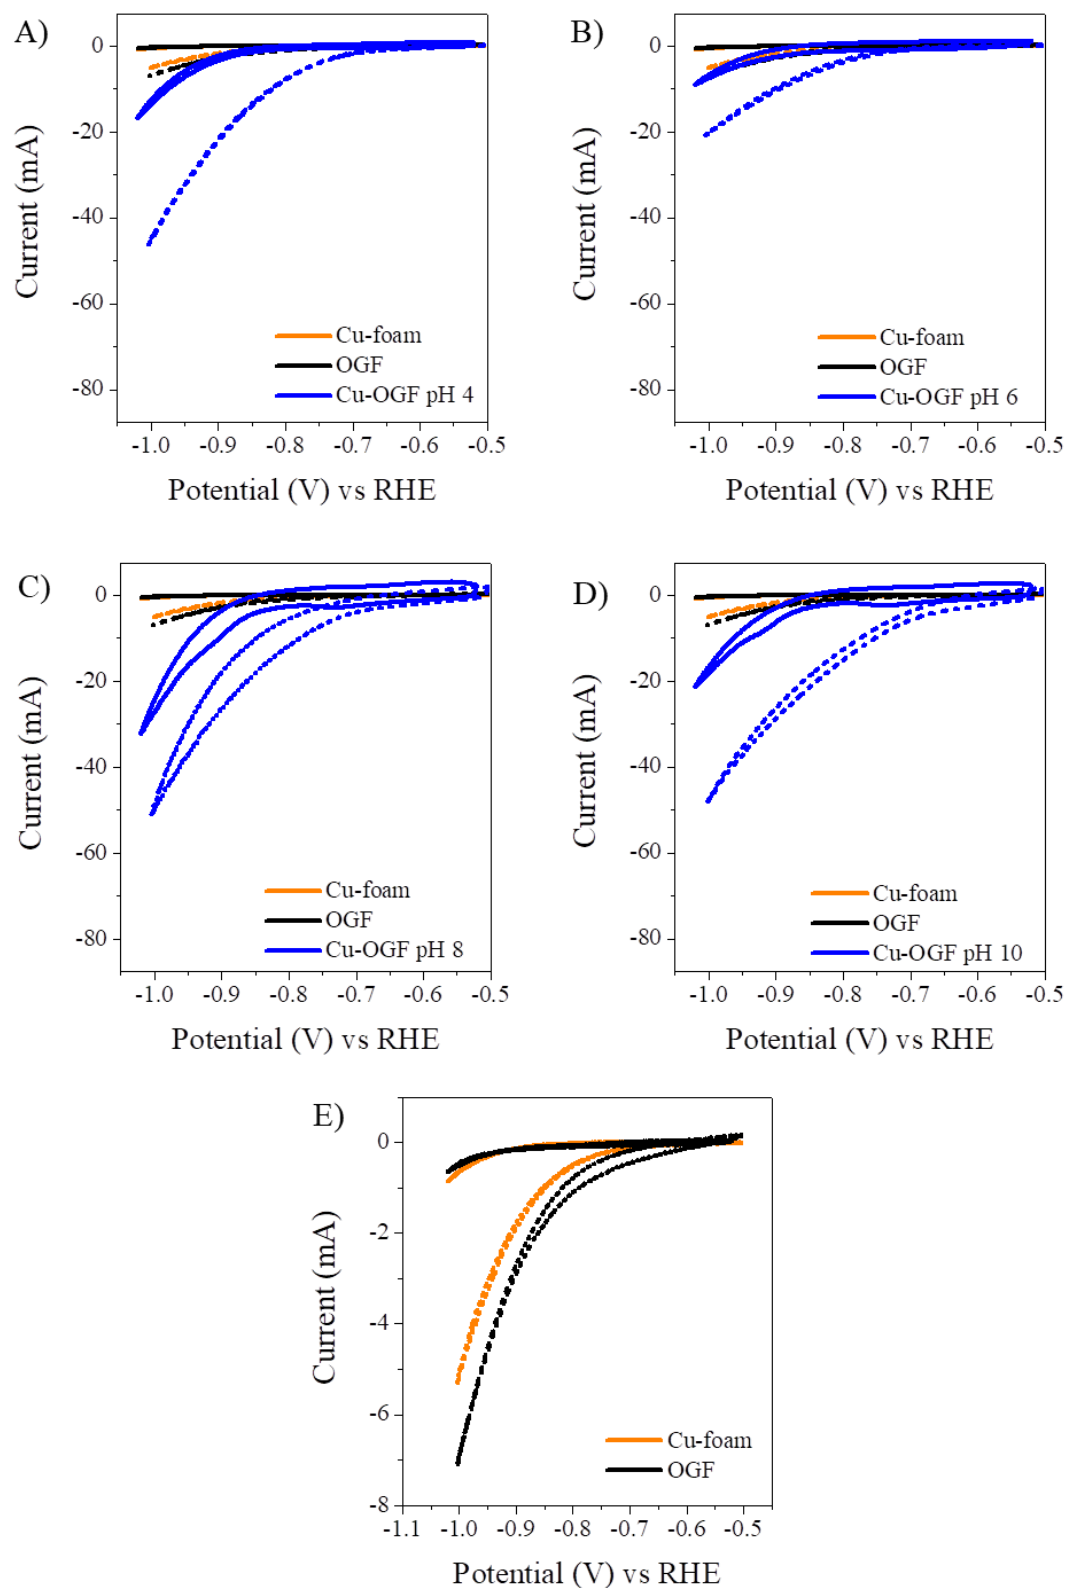

**Figure S11.** Cyclic voltammograms of the A) Cu-OGF pH 4, B) Cu-OGF pH 6, C) Cu-OGF pH 8, D) Cu-OGF pH 10 E) OGF and Cu-foam electrodes in 0.1 NaHCO<sub>3</sub> and 0.1 M KCl N<sub>2</sub>-saturated and CO<sub>2</sub>-saturated. Scan rate 1 mV.s<sup>-1</sup>.

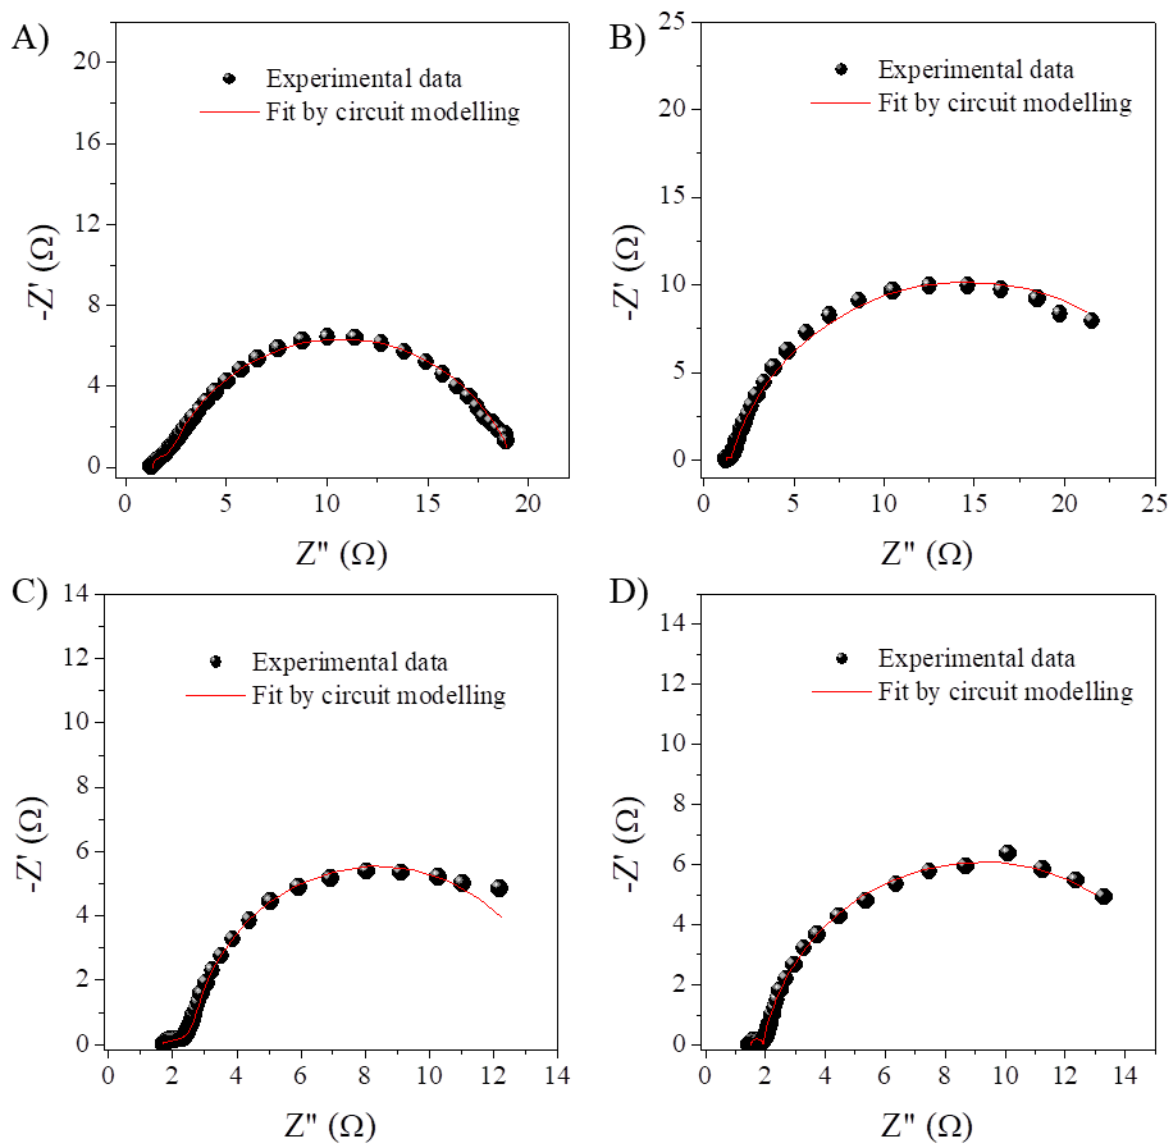

**Figure S12.** Nyquist diagrams and equivalent circuit simulation data of the electrodes A) Cu-OGF pH 4, B) Cu-OGF pH 6, C) Cu-OGF pH 8, and D) Cu-OGF pH 10 in 0.1 M  $\text{NaHCO}_3$  and 0.1 M KCl  $\text{CO}_2$ -saturated at -0.68 V vs RHE.

**Table S4.** Equivalent circuit simulation data of Cu-OGF pH 2, Cu-OGF pH 4, Cu-OGF pH 6, Cu-OGF pH 8, and Cu-OGF pH 10 electrodes.

| Electrode    | $R_s$ ( $\Omega$ ) | $R_{ct}$ ( $\Omega$ ) | $C_{dl}$ (mF)    | $R_p$ ( $\Omega$ ) | CPE (mF)          | Goodness of fit       |
|--------------|--------------------|-----------------------|------------------|--------------------|-------------------|-----------------------|
| Cu-OGF pH 2  | $1.267 \pm 0.008$  | $0.198 \pm 0.029$     | $28.90 \pm 6.08$ | $9.239 \pm 0.144$  | $174.00 \pm 6.00$ | $1.91 \times 10^{-4}$ |
| Cu-OGF pH 4  | $1.282 \pm 0.032$  | $0.972 \pm 0.116$     | $2.466 \pm 0.40$ | $17.030 \pm 0.373$ | $30.55 \pm 0.17$  | $2.29 \times 10^{-4}$ |
| Cu-OGF pH 6  | $1.225 \pm 0.004$  | $0.269 \pm 0.008$     | $5.757 \pm 0.34$ | $26.180 \pm 0.569$ | $321.00 \pm 1.48$ | $2.72 \times 10^{-4}$ |
| Cu-OGF pH 8  | $1.351 \pm 0.034$  | $0.973 \pm 0.117$     | $2.47 \pm 0.47$  | $17.030 \pm 0.370$ | $30.00 \pm 0.20$  | $1.12 \times 10^{-3}$ |
| Cu-OGF pH 10 | $1.520 \pm 0.013$  | $0.502 \pm 0.002$     | $4.15 \pm 0.43$  | $13.880 \pm 0.005$ | $763.00 \pm 0.01$ | $3.24 \times 10^{-4}$ |

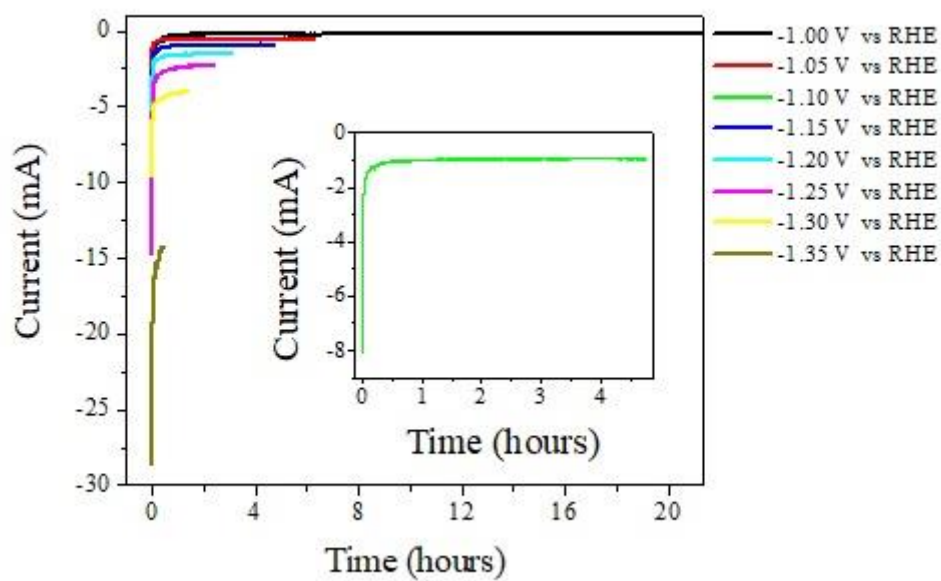

**Figure S13.** Chronoamperometry curves of Cu-OGF pH 2 electrode at different applied voltages in CO<sub>2</sub>-saturated NaHCO<sub>3</sub>-saturated electrolyte.



**Table S5.** Chronoamperometry results at different applied voltages and faradaic efficiency towards CO, H<sub>2</sub> and total.

| Potential (V) vs RHE | Total volume (mL) | Analyzed volume (mL) | Q (C) | n CO <sub>2</sub> (mmol) | n CO (mmol) | FE CO (%) | FE H <sub>2</sub> (%) | Total FE (%) |
|----------------------|-------------------|----------------------|-------|--------------------------|-------------|-----------|-----------------------|--------------|
| -1.00                | 5.20              | 5.20                 | 17.01 | 0.135                    | 0.0005      | 0.58      | 85.58                 | 86.17        |
| -1.05                | 5.10              | 5.10                 | 13.12 | 0.151                    | 0.0008      | 1.11      | 80.39                 | 81.50        |
| -1.10                | 9.00              | 5.10                 | 45.96 | 0.137                    | 0.0026      | 1.92      | 50.87                 | 52.79        |
| -1.15                | 5.20              | 5.20                 | 17.17 | 0.155                    | 0.0032      | 3.54      | 61.65                 | 65.19        |
| -1.20                | 5.20              | 5.20                 | 17.90 | 0.137                    | 0.0029      | 3.13      | 78.09                 | 81.22        |
| -1.25                | 5.20              | 5.20                 | 21.51 | 0.138                    | 0.0030      | 2.73      | 64.57                 | 67.31        |
| -1.30                | 5.20              | 5.20                 | 21.16 | 0.134                    | 0.0030      | 2.76      | 69.38                 | 72.15        |
| -1.35                | 5.20              | 5.20                 | 24.14 | 0.124                    | 0.0019      | 1.49      | 69.61                 | 71.10        |

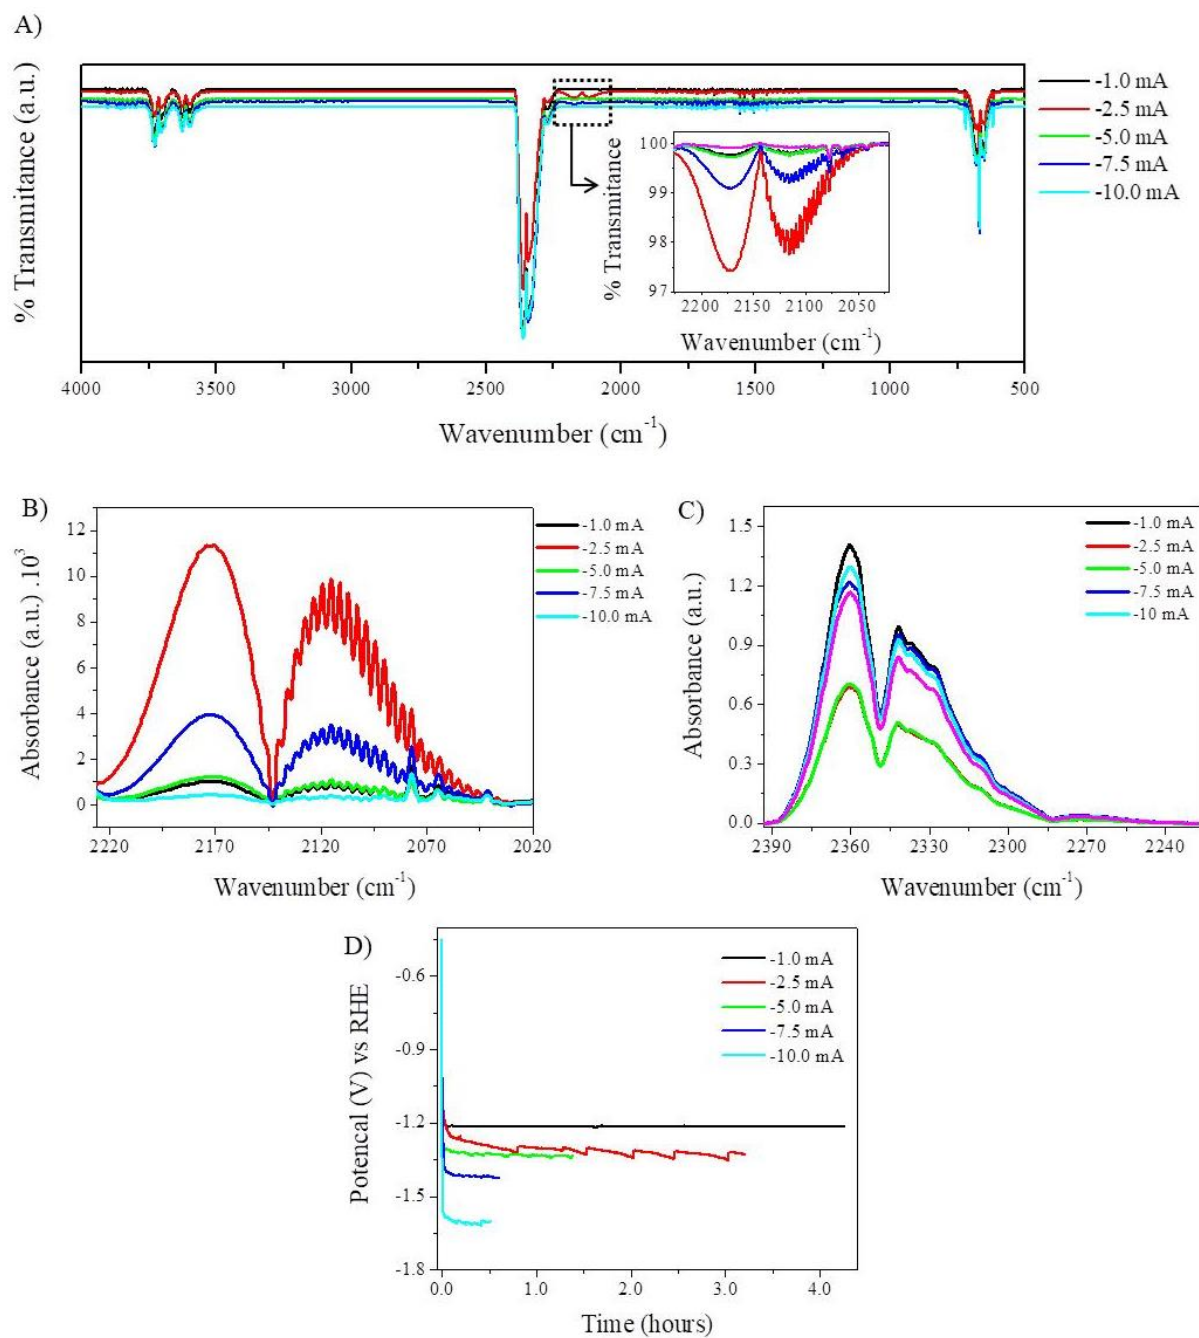

**Figure S14.** A) FTIR spectra of the produced gases at different currents at 4000-500  $\text{cm}^{-1}$  (inset: 2226-2020  $\text{cm}^{-1}$ ), B) and C) absorption regions of carbon monoxide and carbon dioxide, respectively. D) Chronopotentiometric curves.

**Table S6.** Chronopotentiometry results at different currents and faradaic efficiency towards CO, H<sub>2</sub> and total.

| Current (mA) | Total volume (mL) | Analyzed volume (mL) | Q (C) | n CO <sub>2</sub> (mmol) | n CO (mmol) | FE CO (%) | FE H <sub>2</sub> (%) | Total FE (%) |
|--------------|-------------------|----------------------|-------|--------------------------|-------------|-----------|-----------------------|--------------|
| -1.0         | 4.90              | 4.90                 | 15.33 | 0.124                    | 0.0009      | 1.12      | 95.04                 | 96.16        |
| -2.5         | 5.00              | 5.00                 | 28.89 | 0.064                    | 0.0078      | 5.21      | 88.80                 | 94.02        |
| -5.0         | 4.70              | 4.70                 | 24.99 | 0.064                    | 0.0009      | 0.72      | 98.30                 | 99.02        |
| -7.5         | 6.40              | 5.00                 | 16.42 | 0.119                    | 0.0028      | 3.25      | 97.00                 | 100.25       |
| -10.0        | 5.00              | 5.00                 | 18.41 | 0.116                    | 0.0005      | 0.50      | 91.78                 | 92.27        |

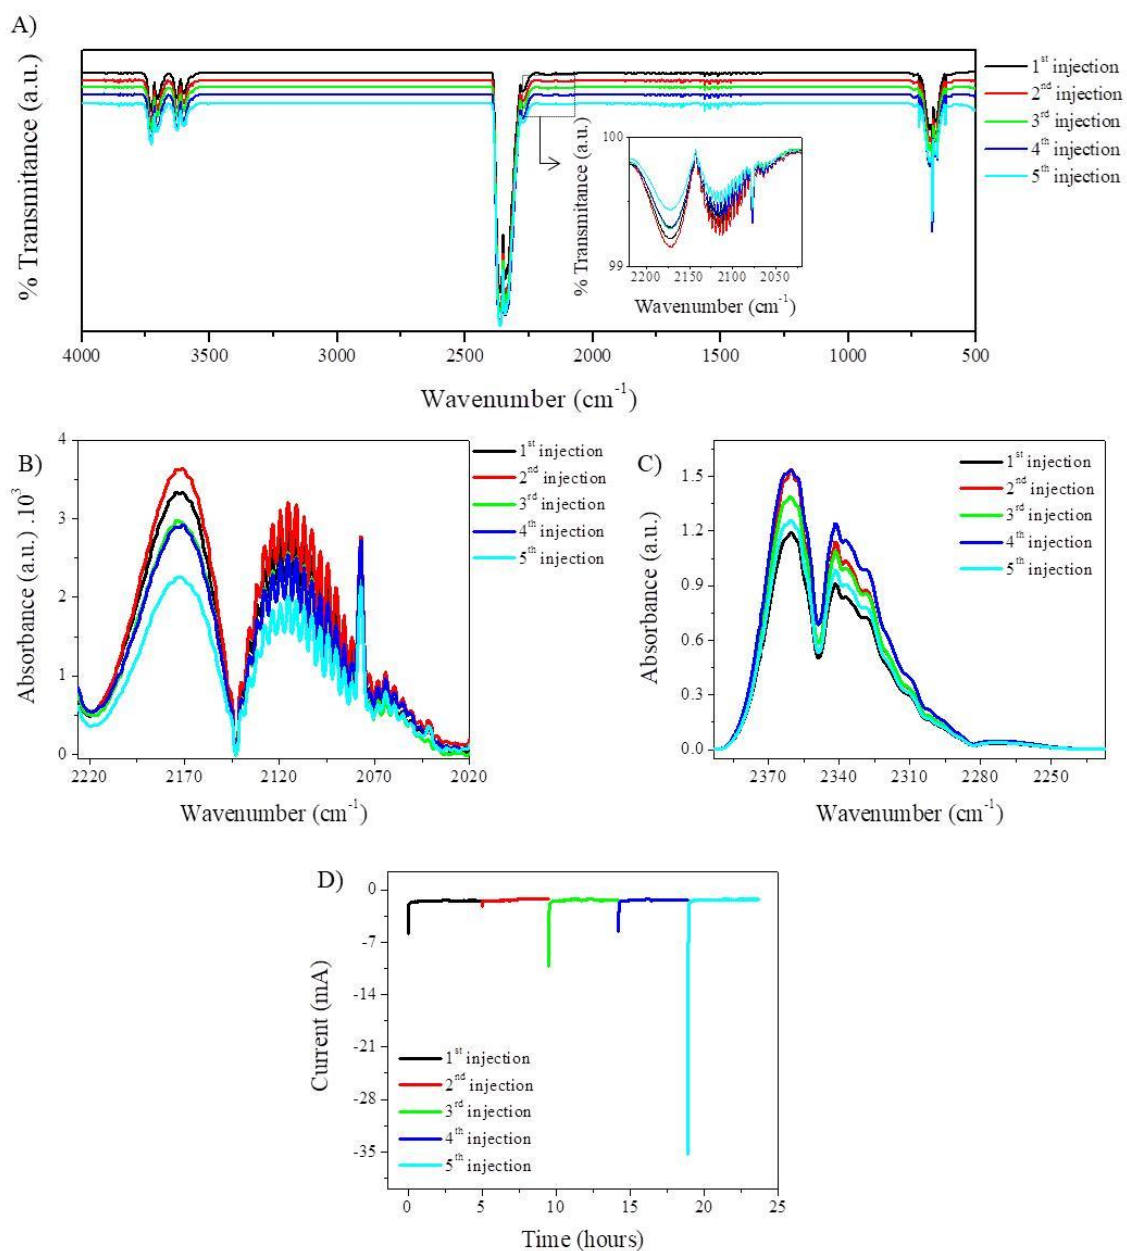

**Figure S15.** A) FTIR spectra of the produced gases at  $-1.15$  V vs RHE at  $4000\text{-}500$   $\text{cm}^{-1}$  (inset:  $2226\text{-}2020$   $\text{cm}^{-1}$ ), B) and C) absorption regions of carbon monoxide and carbon dioxide, respectively. D) Chronoamperometric curve.

**Table S7.** Chronoamperometric results at -1.15 V vs RHE and faradaic efficiency towards CO, H<sub>2</sub> and total.

| Injection | Total volume (mL) | Analyzed volume (mL) | Q (C) | n CO <sub>2</sub> (mmol) | n CO (mmol) | FE CO (%) | FE H <sub>2</sub> (%) | Total FE (%) |
|-----------|-------------------|----------------------|-------|--------------------------|-------------|-----------|-----------------------|--------------|
| 1st       | 4.90              | 4.90                 | 17.17 | 0.112                    | 0.0024      | 2.67      | 97.03                 | 99.70        |
| 2nd       | 11.90             | 5.20                 | 48.24 | 0.112                    | 0.0024      | 2.21      | 90.26                 | 92.47        |
| 3rd       | 6.40              | 5.30                 | 23.61 | 0.134                    | 0.0026      | 2.57      | 78.89                 | 81.45        |
| 4th       | 6.90              | 5.10                 | 23.27 | 0.130                    | 0.0021      | 2.36      | 85.75                 | 88.11        |
| 5th       | 4.90              | 4.90                 | 18.98 | 0.119                    | 0.0017      | 1.72      | 81.29                 | 83.01        |

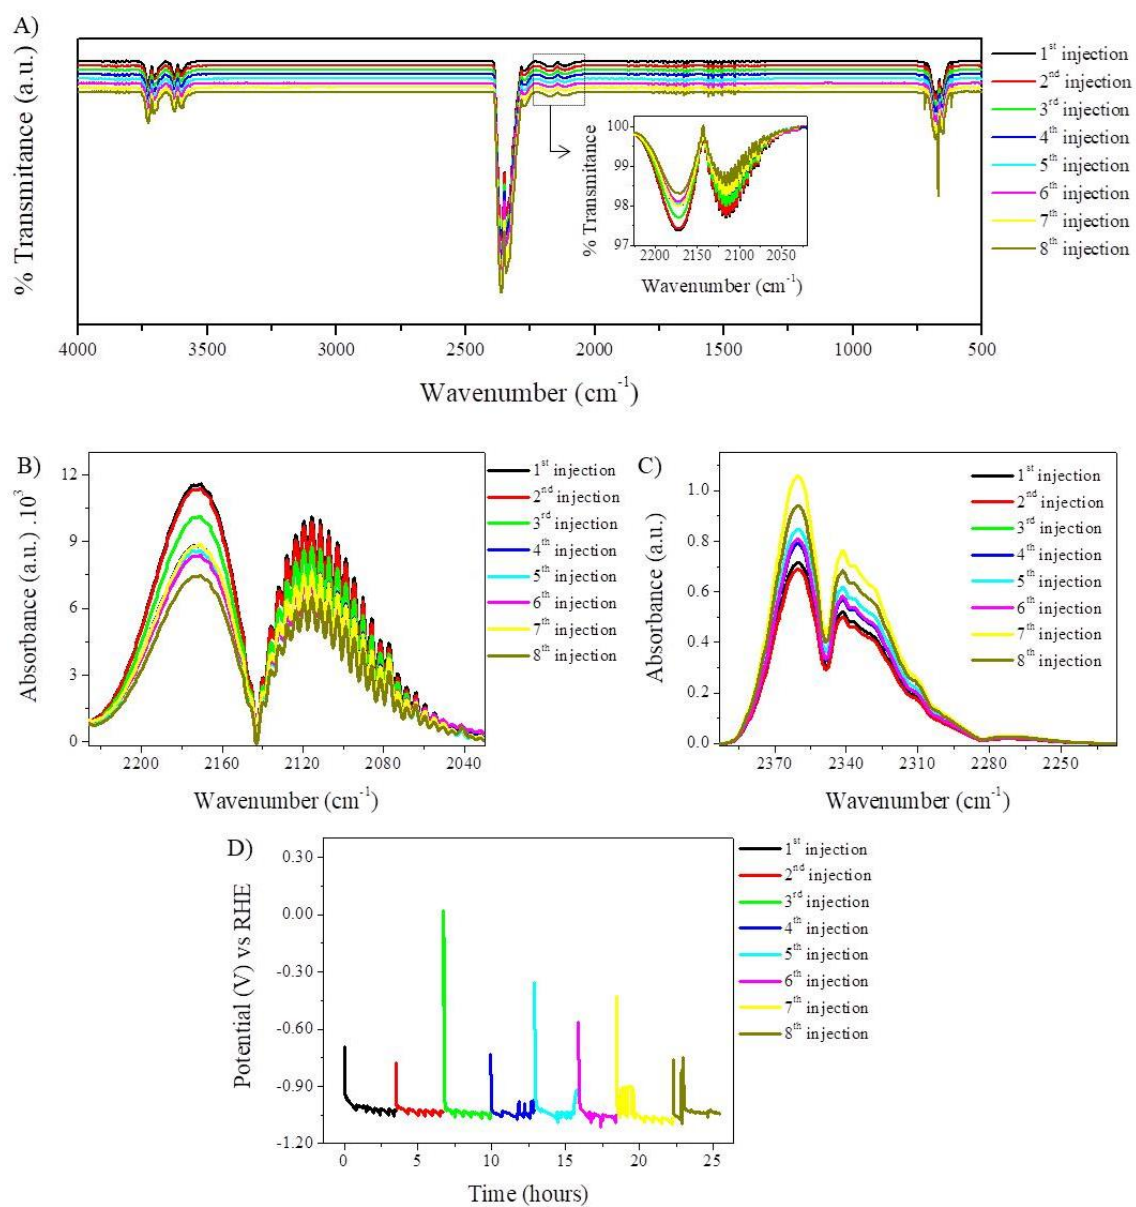

**Figure S16.** A) FTIR spectra of the produced gases at -2.5 mA at 4000-500  $\text{cm}^{-1}$  (inset: 2226-2020  $\text{cm}^{-1}$ ), B) and C) absorption regions of carbon monoxide and carbon dioxide, respectively. D) Chronopotentiometric curve.

**Table S8.** Chronopotentiometric results at -2.5 mA and faradaic efficiency towards CO, H<sub>2</sub> and total.

| Injection | Total volume (mL) | Analyzed volume (mL) | Q (C) | n CO <sub>2</sub> (mmol) | n CO (mmol) | FE CO (%) | FE H <sub>2</sub> (%) | Total FE (%) |
|-----------|-------------------|----------------------|-------|--------------------------|-------------|-----------|-----------------------|--------------|
| 1st       | 5.00              | 5.00                 | 31.79 | 0.066                    | 0.008       | 4.88      | 79.02                 | 83.89        |
| 2nd       | 5.00              | 5.00                 | 28.89 | 0.064                    | 0.008       | 5.21      | 88.80                 | 94.02        |
| 3rd       | 5.00              | 5.00                 | 28.74 | 0.070                    | 0.007       | 4.68      | 85.61                 | 90.29        |
| 4th       | 5.00              | 5.00                 | 25.67 | 0.073                    | 0.006       | 4.59      | 94.41                 | 99.00        |
| 5th       | 5.00              | 5.00                 | 25.29 | 0.079                    | 0.006       | 4.46      | 91.19                 | 95.65        |
| 6th       | 5.00              | 5.00                 | 25.88 | 0.074                    | 0.006       | 4.43      | 92.77                 | 97.21        |
| 7th       | 5.80              | 5.80                 | 30.06 | 0.097                    | 0.006       | 3.93      | 86.37                 | 90.30        |
| 8th       | 5.50              | 5.50                 | 26.70 | 0.088                    | 0.005       | 3.70      | 95.58                 | 99.28        |

In order to compare with a standard sample, chronopotentiometric experiments for CO and H<sub>2</sub> quantification were performed using Cu-Foam of the same geometric dimensions (4.0 cm x 1.0 cm x 0.2 cm) as the working electrode. Chronopotentiometric curves are presented in Figure S17 (A), and FTIR spectra in Figure S17 (B-E). From these results, the faradaic efficiencies for CO and H<sub>2</sub> were calculated, and the results are shown in Table S9. As can be seen from these results, Cu-foam requires a much higher current than Cu-OGF pH 2 for CO and H<sub>2</sub> production, with low faradaic efficiencies (0.55 % and 3.19 %, respectively). In addition, as can be seen from the expanded FTIR spectrum, the presence of a characteristic C-H stretching peak at 3000 cm<sup>-1</sup> indicates low selectivity for CO and H<sub>2</sub> (Figure S17 C).



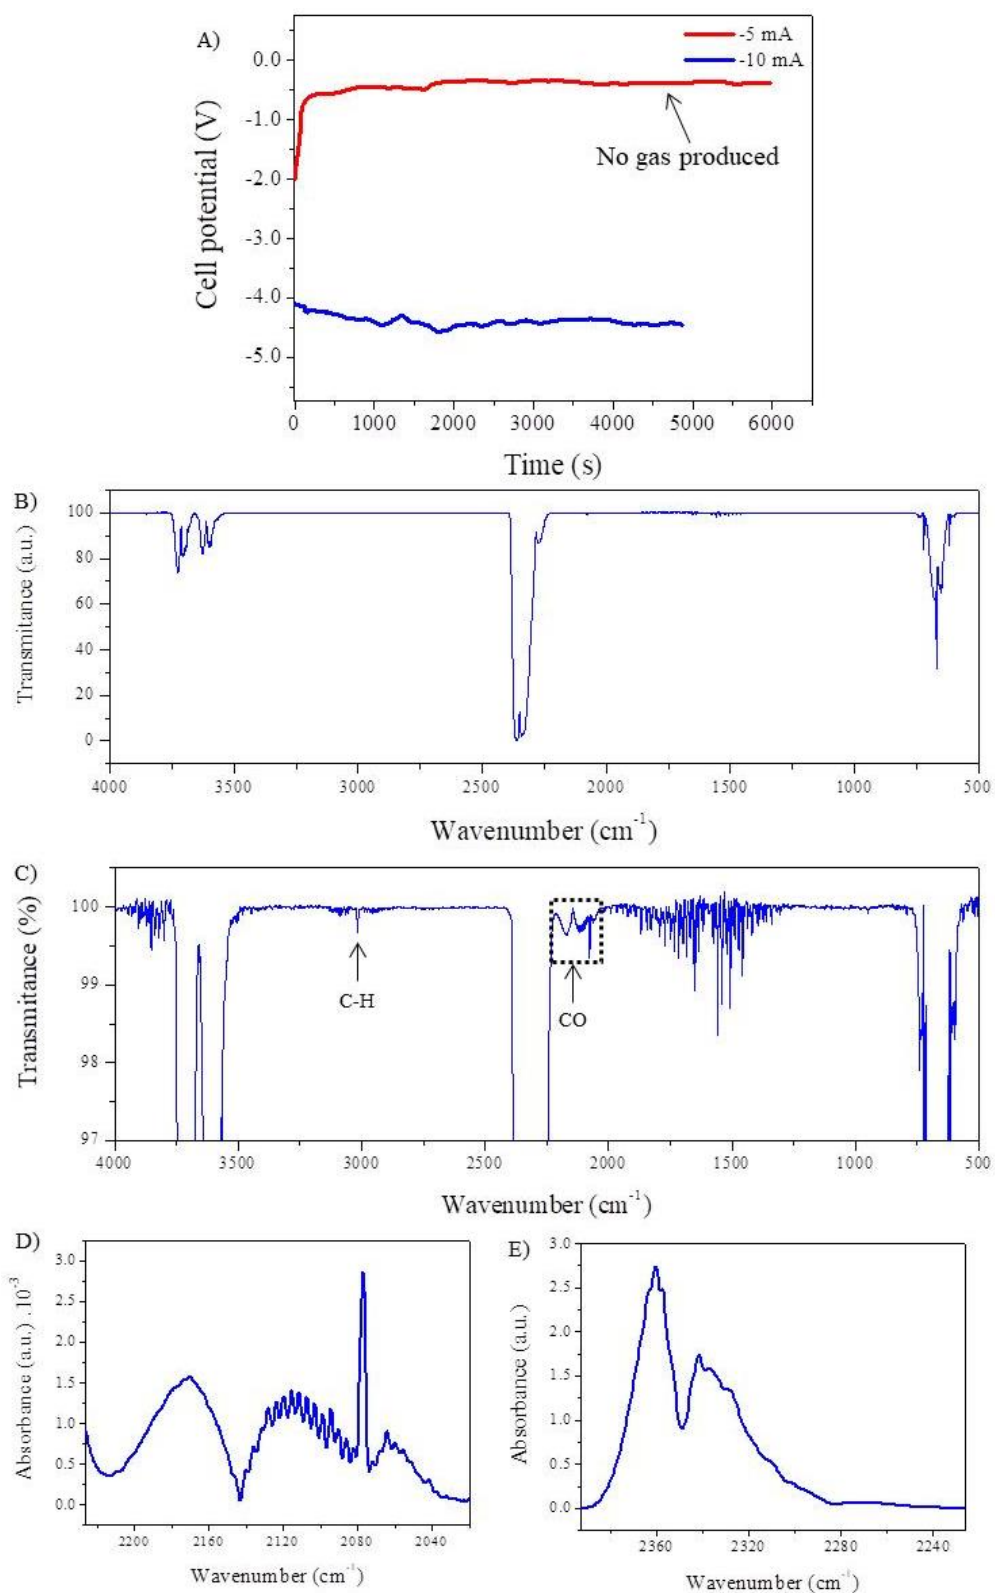

**Figure S17.** A) Chronopotentiometric curves of Cu foam electrode at -5.0 mA and -10 mA in a two-electrode configuration cell; B-C) Full-range and expanded FTIR spectra of the produced gas at -10 mA, respectively; and D) absorption region of carbon monoxide and E) carbon dioxide.

**Table S9.** Chronopotentiometric results at -10.0 mA and faradaic efficiency towards CO, H<sub>2</sub> and total for Cu-foam electrode.

| Total volume (mL) | Analyzed volume (mL) | Q (C) | n CO <sub>2</sub> (mmol) | n CO (mmol) | FE CO (%) | FE H <sub>2</sub> (%) | Total FE (%) |
|-------------------|----------------------|-------|--------------------------|-------------|-----------|-----------------------|--------------|
| 5.20              | 5.20                 | 45.85 | 0.204                    | 0.0013      | 0.55      | 3.19                  | 3.74         |

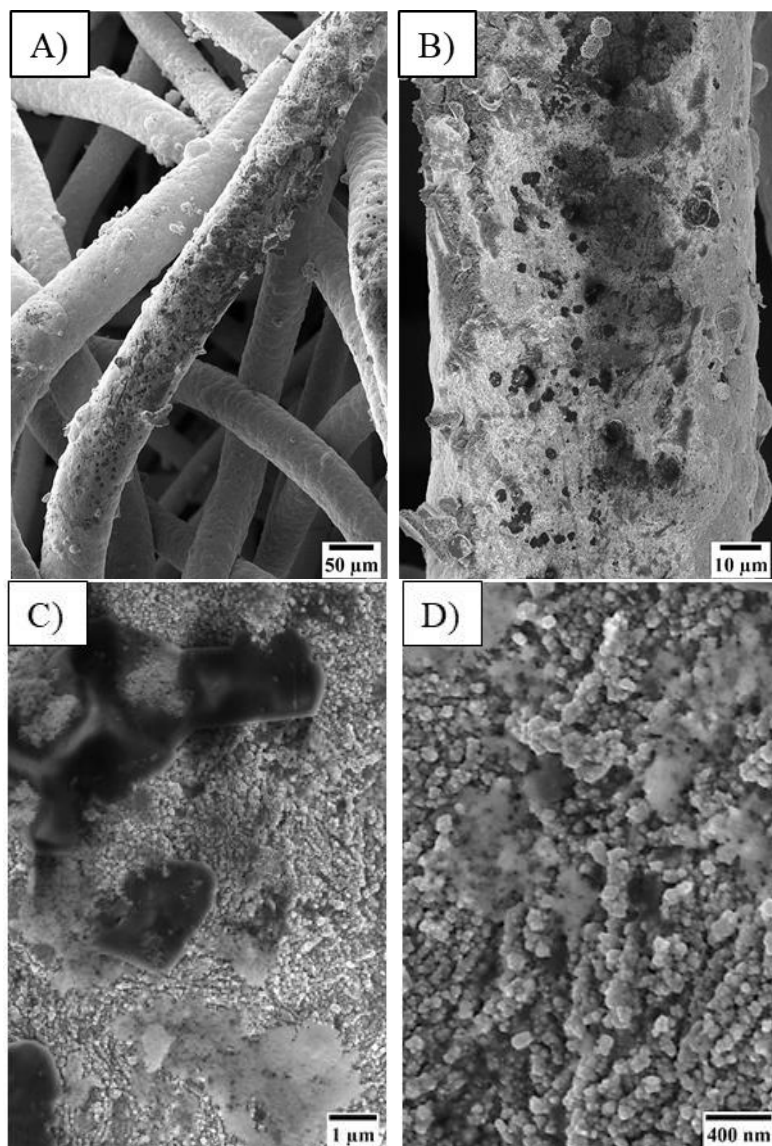

**Figure S18.** A-B) Low and C-D) high-magnification SEM images of post-electrolysis Cu-OGF pH 2 electrode.

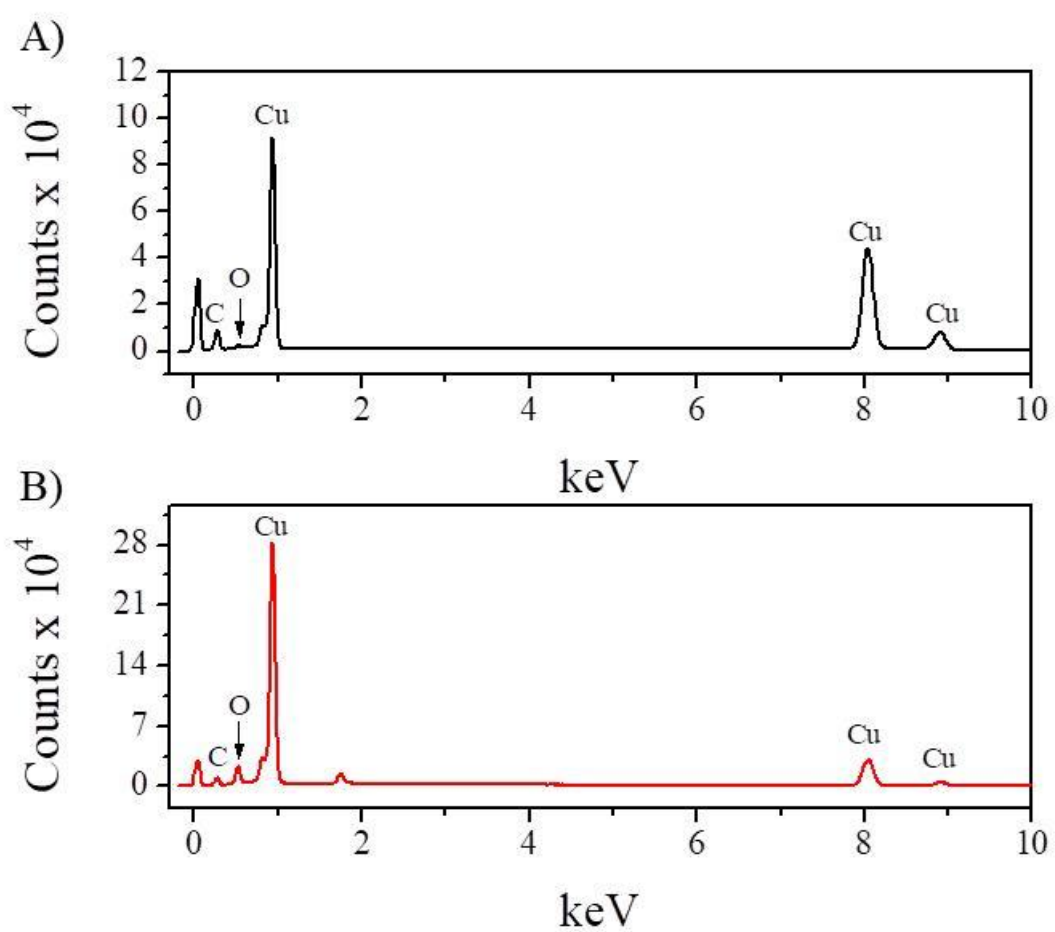

**Figure S19.** EDX spectra of A) pre and B) post-electrolysis Cu-OGF pH 2 electrode.
